# Supplementary material for: A dual responsive hyaluronic acid graft poly(ionic liquid) block copolymer micelle for an efficient CD44-targeted antitumor drug delivery
Source: Royal Society of Chemistry journal article supplement (doi:10.1039/c9nj02608h), 2019-01-01
Supplement: c9nj02608h1.pdf [file c9nj02608h1.pdf]

## Supporting Information

# Dual Responsive Hyaluronic Acid Graft Poly(ionic liquid) Block Copolymer Micelle for Efficient CD44 Targeted Antitumor Drug Delivery

Beibei Lu<sup>a,b</sup>, Yuanbin Li<sup>a,b</sup>, Zhenyuan Wang<sup>a,b</sup>, Binshen Wang<sup>a,b</sup>, Xi Pan<sup>a,b</sup>, Weiwei Zhao<sup>a,b</sup>, Xing Ma<sup>a,b</sup> and Jiaheng Zhang<sup>a,b,\*</sup>

*<sup>a</sup>State Key Laboratory of Advanced Welding and Joining, Harbin Institute of Technology, Shenzhen, 518055, China.*

*<sup>b</sup>Research Centre of Printed Flexible Electronics, School of Materials Science and Engineering, Harbin Institute of Technology, Shenzhen, 518055, China*

*E-mail: zhangjiaheng@hit.edu.cn*

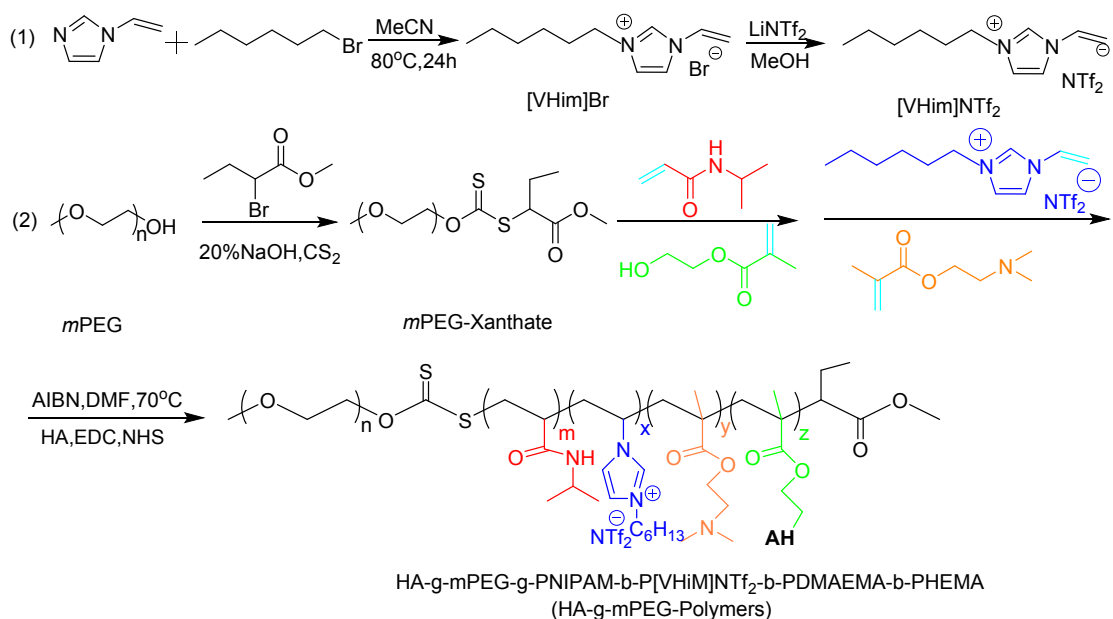

**Fig. S 1** Synthesis of block copolymer HA-g-*m*PEG-g-PNIPAM-*b*-P[VHim]NTf<sub>2</sub>-*b*-PDMAEMA-*b*-PHEMA (HA-g-*m*PEG-g-Polymer) by reversible addition and fragmentation chain transfer (RAFT) method

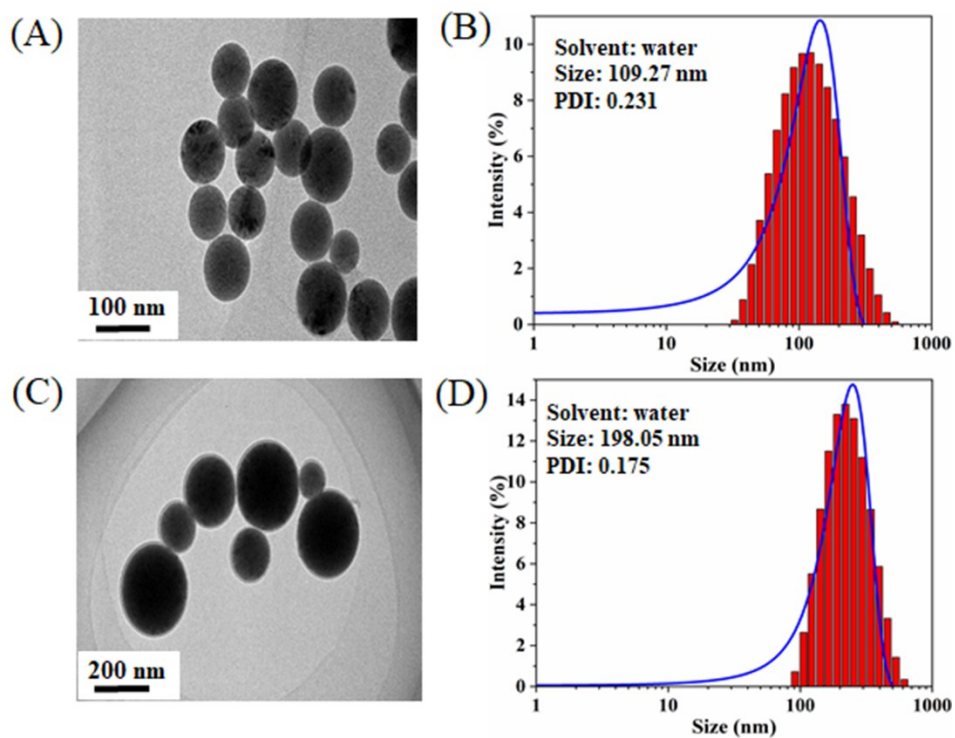

**Fig. S 2** TEM (A and C) and particle size distribution curves (B and D) of *m*PEG-polymers-1 and *m*PEG-polymers @DOX-1 micelles in aqueous media, the data are shown as mean  $\pm$  SD ( $n = 3$ )

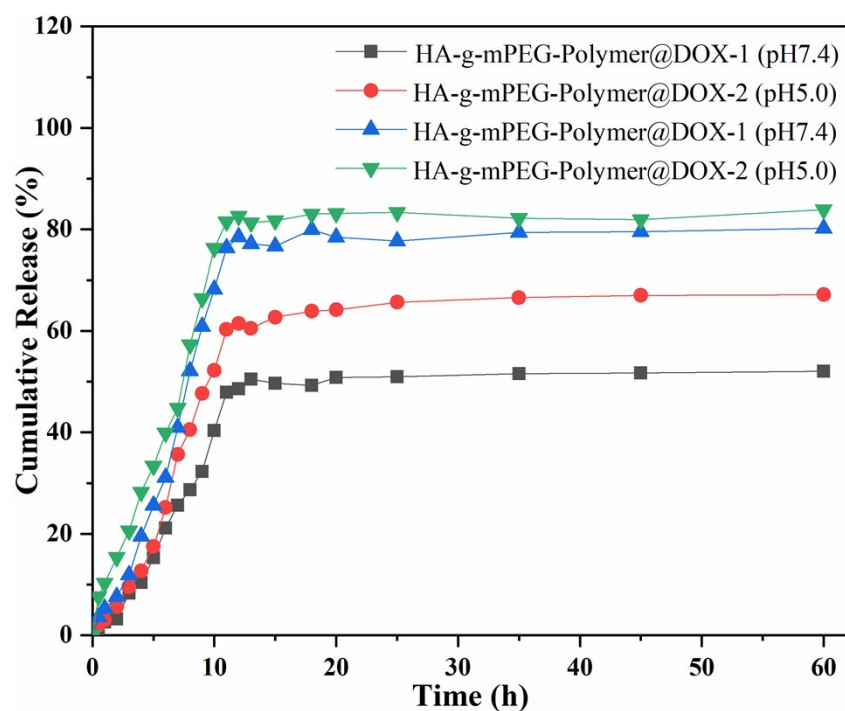

**Fig. S 3** *In vitro* DOX release curves for HA-g-mPEG-Polymer@DOX micelles at 50°C under pH 7.4 and pH 5.0

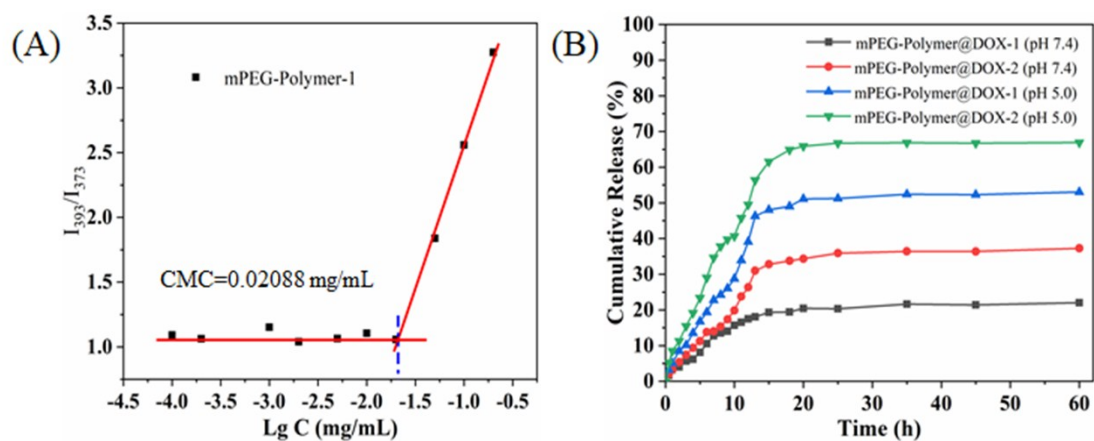

**Fig. S 4** (a) Fluorescence intensity ratio  $I_{393}/I_{373}$  of pyrene as a function of mPEG-Polymer-1 micelles concentration in water. (d) *In vitro* DOX release curves for mPEG-Polymer@DOX micelles at 37°C under pH 7.4 and pH 5.0

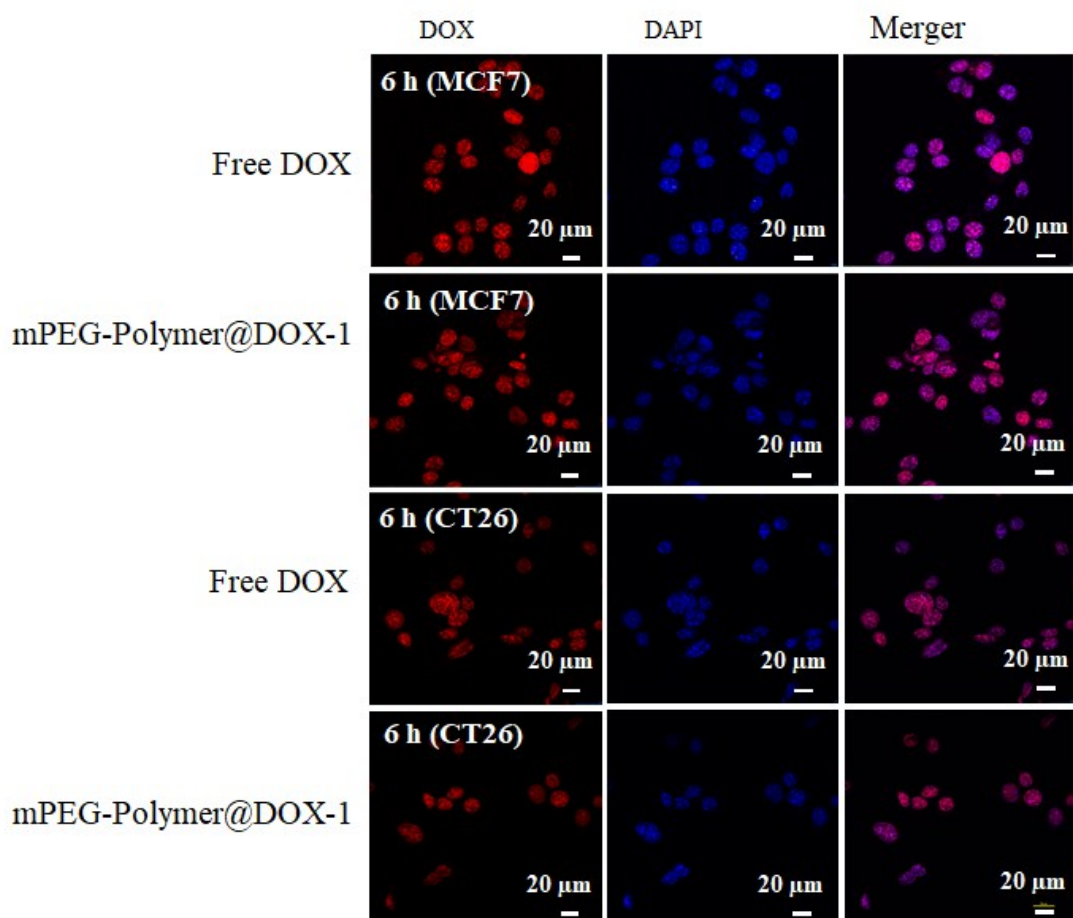

**Fig. S 5** CLSM images of MCF-7 and CT26 cells treated with mPEG-Polymer @DOX micelles (DOX equivalent amount of 1 mg/mL) at 6 h, respectively. (Scale bars: 20  $\mu\text{m}$ )

**Table S 1** Fluorescence intensity of MCF-7 (Fig. 5B) and CT26 (Fig. 5C) cells incubated with control group, free DOX, HA-g-mPEG-Polymer@DOX-1, and mPEG-Polymer for@DOX-1 for 1 or 4 h

| Groups                    | Fluorescence intensity<br>(MCF-7 cells) | Fluorescence intensity<br>(CT26 cells) |
|---------------------------|-----------------------------------------|----------------------------------------|
| Control                   | 2.471±0.19                              | 0.936±0.18                             |
| Free DOX (1 h)            | 19.96±1.78                              | 6.11±4.09                              |
| HA-g-mPEG-Polymer-1 (1 h) | 47.71±2.13                              | 23.74±1.75                             |
| mPEG-Polymer-1 (1 h)      | 36.12±4.46                              | 13.93±1.44                             |
| Free DOX (4 h)            | 74.29±4.35                              | 45.94±4.26                             |
| HA-g-mPEG-Polymer-1 (4 h) | 153.79±3.02                             | 79.85±3.60                             |
| mPEG-Polymer-1 (4 h)      | 104.89±4.57                             | 56.71±5.96                             |
